# Supplementary material
Source: PubMed Central journal article supplement (PMC6166808)
Supplement: pnas.1809611115.sapp.pdf [file pnas.1809611115.sapp.pdf]

**SUPPLEMENTAL MATERIAL for:**

**A plant-responsive bacterial signaling system senses an ethanolamine derivative**

Bruna G. Coutinho, Emily Mevers, Amy L. Schaefer, Dale A. Pelletier, Caroline S. Harwood, Jon Clardy and E. Peter Greenberg

Table S1. Compounds present in the Biolog plates PM1-8 that were able to induce *pipA* expression in GM79  $\Delta pipAaapA$  (pP<sub>*pipA*</sub>-*gfp*)

| Compound            | Average fold change relative to negative control from two independent experiments |
|---------------------|-----------------------------------------------------------------------------------|
| Ala-Asp             | 8.9                                                                               |
| Ala-Lys             | 4.8                                                                               |
| Ala-Thr             | 3.3                                                                               |
| D-Ala-D-Ala         | 9.2                                                                               |
| D-Ala-Gly           | 3.8                                                                               |
| <b>Ethanolamine</b> | <b>48.2</b>                                                                       |
| Ethylamine          | 4.4                                                                               |
| Gly-Asp             | 8.5                                                                               |
| Gly-D-Asp           | 7.4                                                                               |
| Gly-D-Ser           | 7.7                                                                               |
| Gly-D-Thr           | 8.4                                                                               |
| Gly-Gly-Phe         | 2.6                                                                               |
| Gly-Lys             | 17.2                                                                              |
| Gly-Met             | 4.9                                                                               |
| Gly-Ser             | 6.8                                                                               |
| Gly-Thr             | 12.0                                                                              |
| His-Gly             | 4.7                                                                               |
| His-His             | 2.6                                                                               |
| L-Cysteine          | 4.1                                                                               |
| L-Lyxose            | 4.5                                                                               |
| Ser-Glu             | 4.6                                                                               |
| Ser-Phe             | 11.4                                                                              |
| Ser-Pro             | 8.3                                                                               |
| Sulfate             | 2.7                                                                               |
| Taurocholic acid    | 3.2                                                                               |
| Thr-Ser             | 2.5                                                                               |

Table S2. Strains and plasmids used in this study

| Strain or plasmid                      | Relevant genotype/phenotype                                                                                            | Ref.      |
|----------------------------------------|------------------------------------------------------------------------------------------------------------------------|-----------|
| <b>Strains</b>                         |                                                                                                                        |           |
| <i>Pseudomonas sp.</i>                 |                                                                                                                        |           |
| GM79                                   | Wild-type isolated from <i>Populus deltoides</i> root endosphere                                                       | (1, 2)    |
| 79Δ <i>aapF</i>                        | Transporter PBP gene ( <i>aapF/PMI36_04617</i> ) in-frame deletion in GM79                                             | this work |
| 79Δ <i>pipR</i>                        | <i>pipR</i> ( <i>PMI36_04623</i> ) in-frame deletion in GM79                                                           | (3)       |
| 79Δ <i>aapB</i>                        | Transporter TMD gene ( <i>aapB/PMI36_04621</i> ) in-frame deletion in GM79                                             | (3)       |
| 79Δ <i>pipAaapA</i>                    | Peptidase-encoding genes <i>pipA</i> ( <i>PMI36_04624</i> ) <i>aapA</i> ( <i>PMI36_04622</i> ) double deletion in GM79 | (3)       |
| <i>E. coli</i>                         |                                                                                                                        |           |
| M15                                    | F-, Φ80Δ <i>lacM15</i> , <i>thi</i> , <i>lac</i> -, <i>mtl</i> -, <i>recA</i> +                                        | Qiagen    |
| S17-1                                  | <i>recA</i> , <i>thi</i> , <i>pro</i> , RP4-2-Tc::Mu-Km::Tn7                                                           | (4)       |
| <b>Plasmids</b>                        |                                                                                                                        |           |
| pQE30                                  | N-terminal His-protein expression vector, Ap <sup>R</sup>                                                              | Qiagen    |
| pRep4                                  | <i>lacI</i> -containing vector, Km <sup>R</sup>                                                                        | Qiagen    |
| pQE <i>aapF</i>                        | Cytoplasmic N-terminal His <sub>6</sub> -AapF expression plasmid, Ap <sup>R</sup>                                      | This work |
| pPROBE-NT                              | Broad host vector containing promoterless <i>gfp</i> reporter, Km <sup>R</sup>                                         | (5)       |
| pP <sub><i>pipA</i></sub> - <i>gfp</i> | <i>pipA</i> promoter region cloned into <i>gfp</i> -reporter pPROBE-NT, Km <sup>R</sup>                                | (3)       |
| pEX19Gm                                | Suicide vector, <i>sacB</i> , Gm <sup>R</sup>                                                                          | (6)       |
| pMMB67EH-TetRA                         | IPTG-inducible, broad host expression plasmid derived from pMMB67EH (7), Tc <sup>R</sup>                               | (3)       |
| pMMA <i>aapF</i>                       | Transporter SBP gene ( <i>aapF/PMI36_04617</i> ) cloned into pMMB67EH-TetRA, Tc <sup>R</sup>                           | this work |

PBP, periplasmic binding protein; TMD, transmembrane domain; Ap, ampicillin; Km, kanamycin; Gm, gentamicin; IPTG, isopropyl β-D-1-thiogalactopyranoside; Tc, tetracycline.

Table S3. Primers used in this study

| Name          | DNA sequence (5'-3')                               | Description                                                        |
|---------------|----------------------------------------------------|--------------------------------------------------------------------|
| aapFmut_1F    | ACTAG <u>AATT</u> CCCCGTGTCGATGAACTGCTGACT         | 79ΔaapF construction                                               |
| aapFmut_1R    | CGGCGAGCAATTTCAAATGCCTGG                           | 79ΔaapF construction                                               |
| aapFmut_2F    | CATTTGAAATTGCTCGCCGCTACATGACCCGCTACAAGAAC<br>GACAA | 79ΔaapF construction                                               |
| aapFmut_2R    | CATGGATCCTCACCTCGTTACAGGCGTTGTGG                   | 79ΔaapF construction                                               |
| aapFcomp_F    | AATGAATTCCAAGAAGGAGTTTGACCATGAGATCCAGG             | 79ΔaapF<br>complementation                                         |
| aapFcomp_R    | CATAAGCTTTCAGTTCTTCACCGTTTCCTCAAGAGAG              | 79ΔaapF<br>complementation                                         |
| CytoHisAapF_F | CCGCGCATGCGCGGGTGTACTCACCATCGG                     | His <sub>6</sub> -AapF cytoplasmic<br>expression in <i>E. coli</i> |
| CytoHisAapF_R | GGCAAGCTTTCAGTTCTTCACCGTTTCCTCAAGAGAGAA            | His <sub>6</sub> -AapF cytoplasmic<br>expression in <i>E. coli</i> |

Restriction enzyme sites are underlined.

## SUPPLEMENT REFERENCES

1. Brown SD, *et al.* (2012) Twenty-one genome sequences from *Pseudomonas* species and 19 genome sequences from diverse bacteria isolated from the rhizosphere and endosphere of *Populus deltoides*. *J. Bacteriol.* 194(21):5991-5993.
2. Timm CM, *et al.* (2015) Metabolic functions of *Pseudomonas fluorescens* strains from *Populus deltoides* depend on rhizosphere or endosphere isolation compartment. *Front. Microbiol.* 6(1118).
3. Schaefer AL, *et al.* (2016) A LuxR homolog in a cottonwood tree endophyte that activates gene expression in response to a plant signal or specific peptides. *mBio* 7(4):e01101-01116.
4. Simon R, Prierer U, & Puhler A (1983) A broad host range mobilization system for *in vivo* genetic engineering: transposon mutagenesis in Gram-negative bacteria. *Nat. Biotech.* 1(9):784-791.
5. Miller WG, Leveau JH, & Lindow SE (2000) Improved *gfp* and *inaZ* broad-host-range promoter-probe vectors. *Mol. Plant Microbe Interact.* 13(11):1243-1250.
6. Hoang TT, Karkhoff-Schweizer RR, Kutchma AJ, & Schweizer HtP (1998) A broad-host-range Flp-FRT recombination system for site-specific excision of chromosomally-located DNA sequences: application for isolation of unmarked *Pseudomonas aeruginosa* mutants. *Gene* 212(1):77-86.
7. Furste JP, *et al.* (1986) Molecular cloning of the plasmid RP4 primase region in a multi-host-range *tacP* expression vector. *Gene* 48(1):119-131.
